# Supplementary material for: Comparison between the Bouchama and Japanese Association for Acute Medicine Heatstroke Criteria with Regard to the Diagnosis and Prediction of Mortality of Heatstroke Patients: A Multicenter Observational Study
Source: MDPI journal article supplement (doi:10.3390/ijerph16183433), 2019-09-16
Supplement: s1 [file s1]

## Supple 1.

| Criteria for DIC                                     | Score |
|------------------------------------------------------|-------|
| Systemic inflammatory response syndrome criteria*    |       |
| ≥ 3                                                  | 1     |
| 0-2                                                  | 0     |
| Platelet counts ( $10^9/L$ )                         |       |
| < 80 or more than 50% decrease within 24 hours       | 3     |
| ≥ 80, <120 or more than 30% decrease within 24 hours | 1     |
| ≥ 120                                                | 0     |
| Prothrombin time (value of patient/normal value)     |       |
| ≥ 1.2                                                | 1     |
| < 1.2                                                | 0     |
| Fibrin/fibrinogen degradation products (mg/L)        |       |
| ≥ 25                                                 | 3     |
| ≥ 10, <25                                            | 1     |
| < 10                                                 | 0     |
| Diagnosis of DIC                                     |       |
| 4 points or more                                     |       |

\*Criteria for *systemic inflammatory response syndrome*

1. Temperature >38 °C or <36 °C
2. Heart rate >90 beats/min
3. Respiratory rate >20 breath /min or  $PaCO_2 \leq 32$  torr
4. White cell blood counts >12,000/mm<sup>3</sup>, <4,000cells/mm<sup>3</sup>, or 10% immature (band) forms
